# Supplementary material for: Comparative Transcriptomic Analyses Reveal the Regulatory Mechanism of Nutrient Limitation-Induced Sporulation of Antrodia cinnamomea in Submerged Fermentation
Source: MDPI journal article supplement (doi:10.3390/foods11172715), 2022-09-05
Supplement: s1 [file s1]

Transcription

Spliceosome

Cell Motility

Bacterial chemotaxis

Flagellar assembly

RNA polymerase

Basal transcription factors

Ribosome

Aminoacyl-tRNA biosynthesis

DNA replication

Folding, Sorting  
and Degradation

Ubiquitin mediated proteolysis

RNA degradation

Proteasome

Mismatch repair

Non-homologous end-joining

Base excision repair

Protein export

Homologous recombination

Replication  
and Repair

Nucleotide excision repair

ABC transporter

Signal  
Transduction

Two-component system

Bacterial secretion system

Phosphotransferase system (PTS)

Membrane  
Transport
