# Supplementary material for: Comparative Transcriptomic Analyses Reveal the Regulatory Mechanism of Nutrient Limitation-Induced Sporulation of Antrodia cinnamomea in Submerged Fermentation
Source: MDPI journal article supplement (doi:10.3390/foods11172715), 2022-09-05

Glycan Biosynthesis and Metabolism

Nucleotide Metabolism

Metabolism of Cofactors and Vitamins

Biosynthesis of Other Secondary Metabolites

Lipid Metabolism

Carbohydrate Metabolism

Amino Acid Metabolism

Energy Metabolism

Metabolism of Other Amino Acid

Metabolism of Terpenoids and Polyketides

Xenobiotics Biodegradation and Metabolism

Metabolism of xenobiotics by cytochrom P450

Drug metabolism - cytochrom P450

Drug metabolism - other enzymes

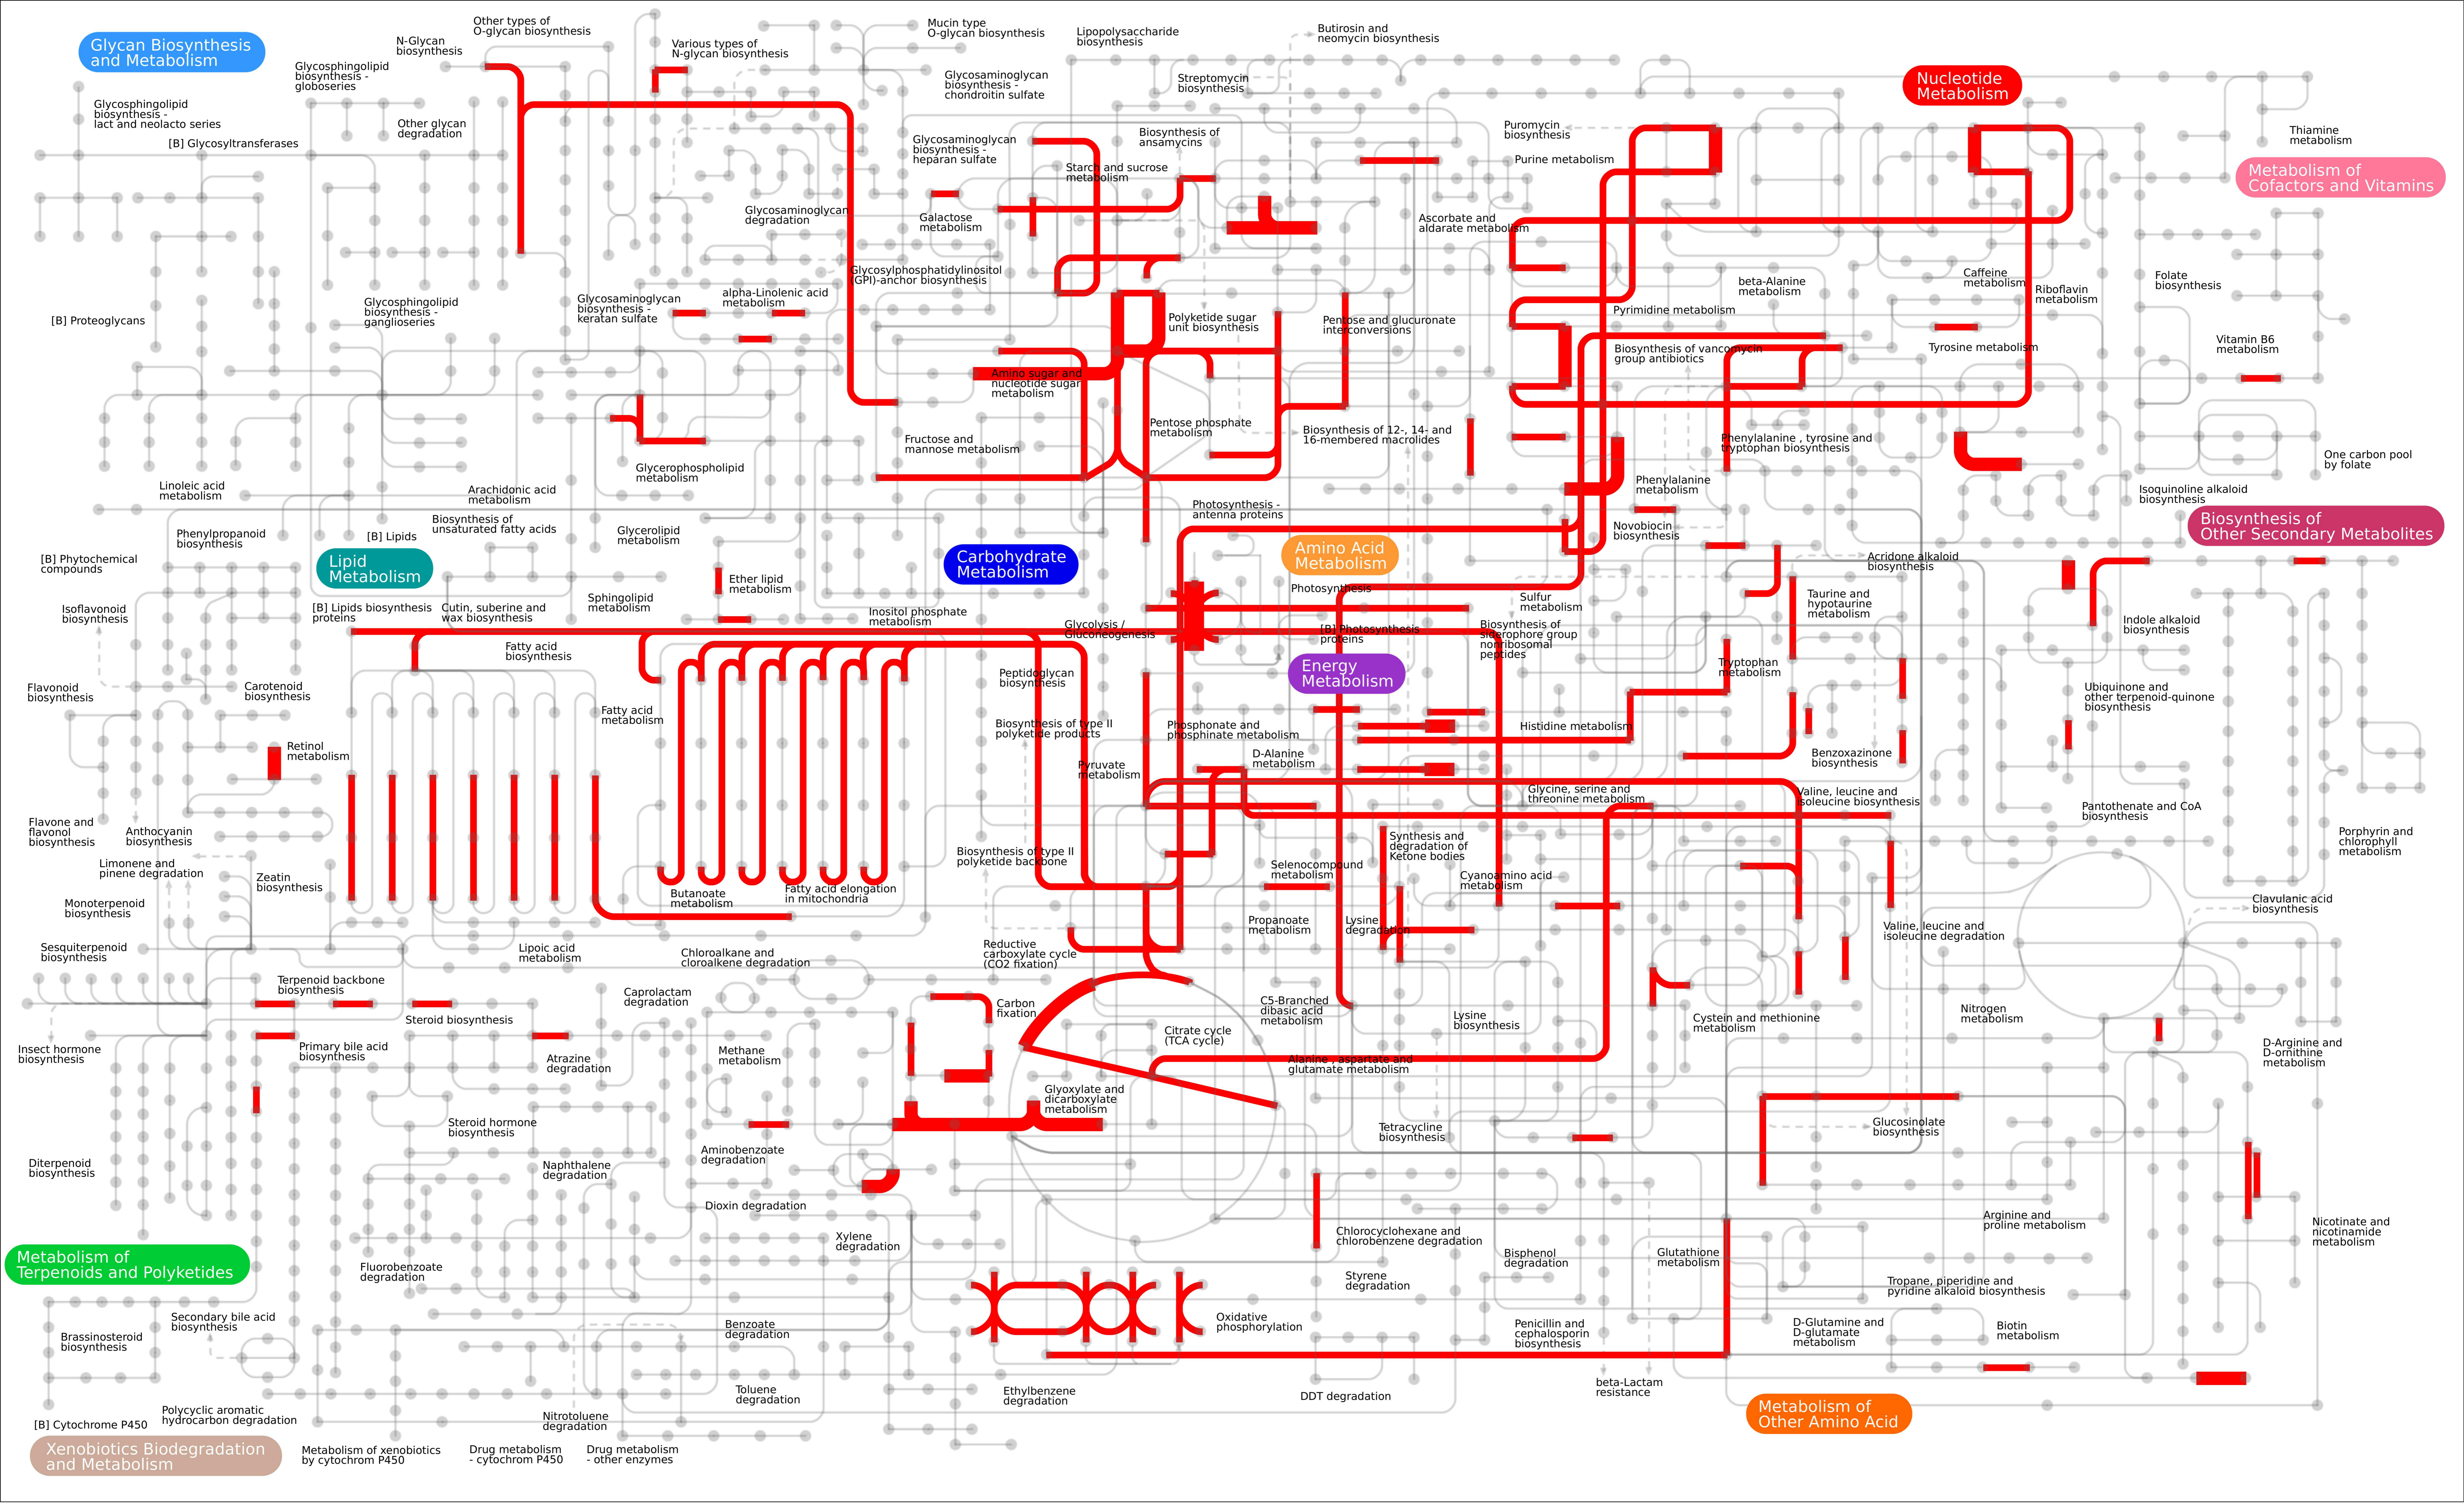

Supplement: s1 [file s1]
